# Supplementary material for: An online model composition tool for system biology models
Source: Springer Nature journal article supplement (doi:10.1186/1752-0509-7-88), 2013-09-05

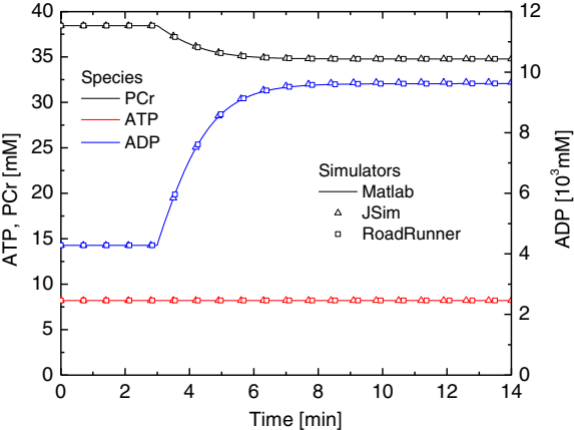

Supplement: 12918_2013_1138_MOESM6_ESM.pdf [file 12918_2013_1138_MOESM6_ESM.pdf]
